# Supplementary material for: Improving organic memory performance through mounting conjugated branches on a triphenylamine core
Source: Royal Society of Chemistry journal article supplement (doi:10.1039/c6tc00363j), 2016-01-01
Supplement: c6tc00363j1.pdf [file c6tc00363j1.pdf]

## Supporting Information

### **Improving organic memory performance through mounting conjugated branches on a triphenylamine core**

*Erbo Shi,<sup>[a]</sup> Jinghui He,<sup>[a]</sup> Hao Zhuang,<sup>[a]</sup> Hongzhang Liu,<sup>[a]</sup> YuanFang Zheng,<sup>[a]</sup> Hua  
Li,<sup>[a]</sup> Qingfeng Xu,<sup>[a]</sup> Junwei Zheng,<sup>[b]</sup> Jianmei Lu<sup>\*[a]</sup>*

<sup>a</sup> College of Chemistry, Chemical Engineering and Materials Science, Collaborative Innovation Center of Suzhou  
Nano Science and Technology, Soochow University, Suzhou 215123, China.

<sup>b</sup> College of Physics, Optoelectronics and Energy, Soochow University, Suzhou 215006, P. R. China.

\*E-mail: [lujm@suda.edu.cn](mailto:lujm@suda.edu.cn); Fax: +86 512 65880367; Tel: +86 512 65880368

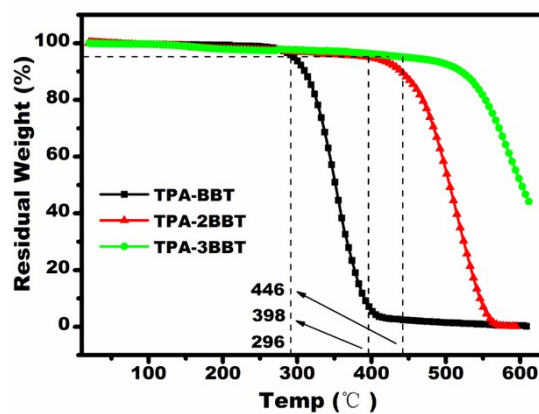

**Fig. S1** TGA curves of the three compounds measured in nitrogen atmosphere at a heating rate of  $10\text{ }^{\circ}\text{C}\cdot\text{min}^{-1}$ .

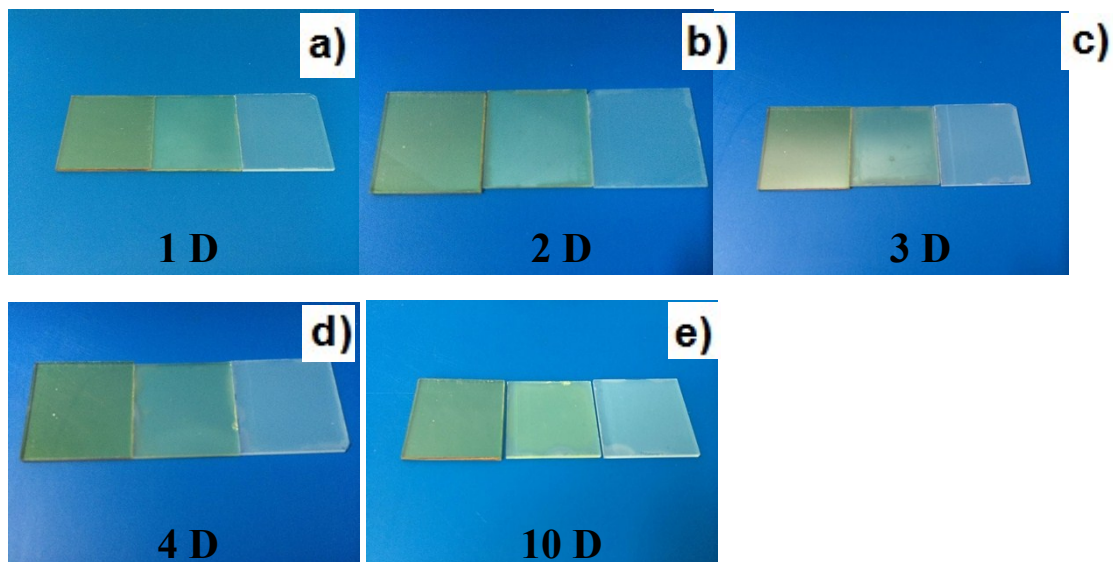

**Fig. S2** The electronic photos of the three compounds film at room temperature: TPA-BBT (right); TPA-2BBT (middle); TPA-3BBT (left).

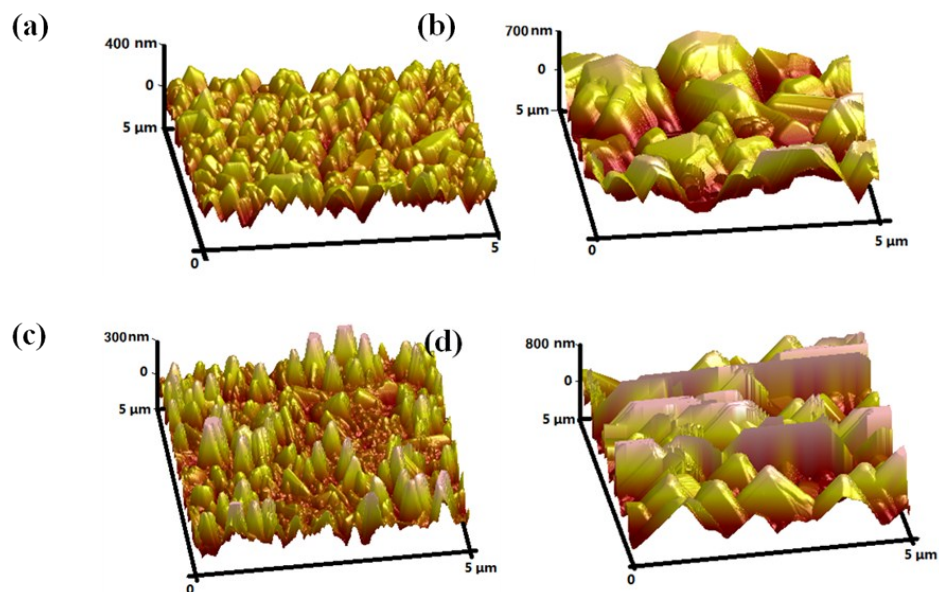

**Fig. S3** Tapping-mode height of AFM topographic images of compounds thin film vacuum-deposited onto ITO at different annealing temperatures: **TPA-BBA** (a (60 °C), b (100 °C)); **TPA-2BBA** (c (60 °C), d (80 °C)).

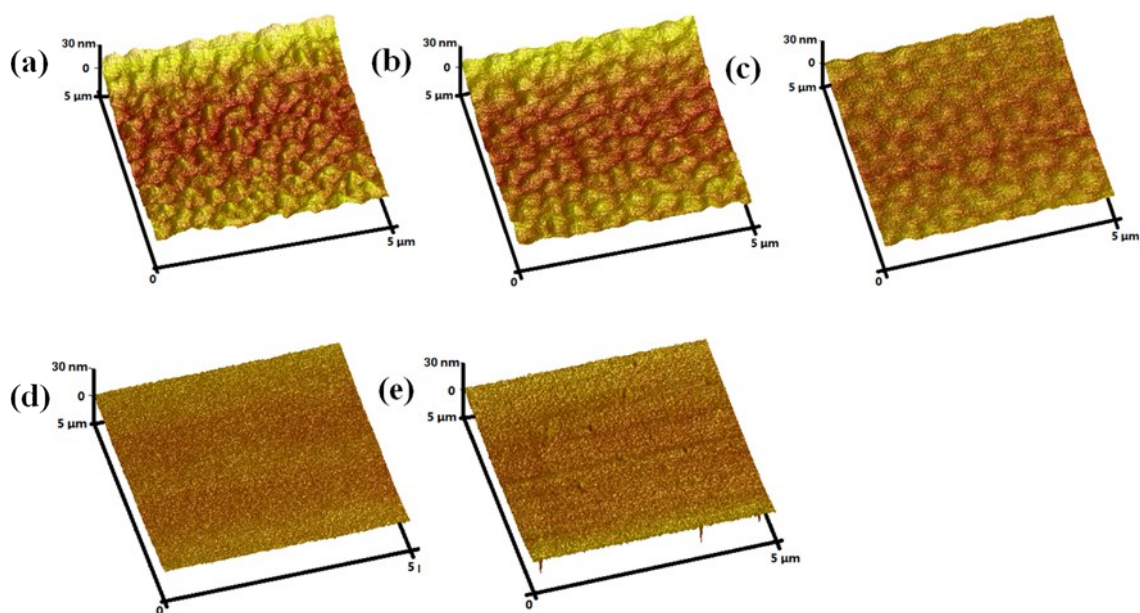

**Fig. S4** Tapping-mode height of AFM topographic images of **TPA-3BBA** thin film vacuum-deposited onto ITO at different annealing temperatures: a (r. t.), b (60 °C), c (80 °C), d (100 °C), e (120 °C).

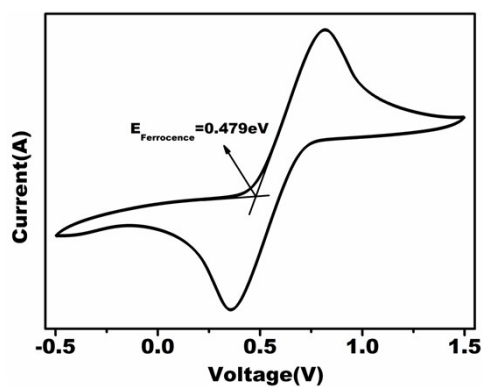

**Fig. S5** Cyclic voltammetry (CV) curves of the ferrocene in anhydrous dichloromethane solution with 0.1 M  $\text{Bu}_4\text{NPF}_6$  as the supporting electrolyte. The scan rate was  $100 \text{ mV} \cdot \text{s}^{-1}$ .

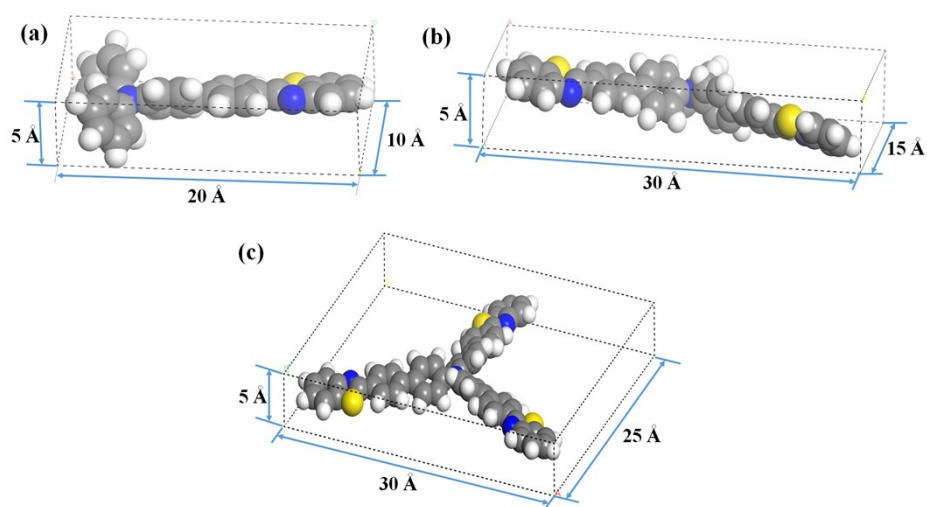

**Fig. S6** The schematic illustration of the TPA-nBBT ( $n=1,2,3$ ) molecular size which was obtained from theoretical calculations (a)TPA-BBT; (b) TPA-2BBT; (c) TPA-3BBT.
